# Supplementary material for: Contributions of catchment and in-stream processes to suspended sediment transport in a dominantly groundwater-fed catchment
Source: Copernicus journal article supplement (doi:10.5194/hess-22-3903-2018), 2018-07-19
Supplement: Supplementary file 1 [file Supplement.pdf › HESS_2018-42_Supplement/Supplement.pdf]

# Contributions of Catchment and In-Stream Processes to Suspended Sediment Transport in a Dominantly Groundwater-Fed Catchment

Yan Liu<sup>1</sup>, Christiane Zarfl<sup>1</sup>, Nandita B. Basu<sup>2</sup>, Marc Schwientek<sup>1</sup>, Olaf A. Cirpka<sup>1</sup>

<sup>1</sup>Center for Applied Geoscience, University of Tübingen, Tübingen, 72074, Germany

5 <sup>2</sup>Department of Civil and Environmental Engineering, University of Waterloo, Waterloo, ON N2L 3G1, Canada

*Correspondence to:* Olaf A. Cirpka (olaf.cirpka@uni-tuebingen.de)

## Contents

- 10 The supplementary material contains 2 tables, 7 equations, and 4 figures. Additional files of HEC-RAS and the code of sediment transport model are also provided. The table, equations, and figures are listed below:
- Table S1. Sensitivity analysis of the sediment transport model
  - Table S2. The PAH concentrations (the sum of 15 PAHs) on different particles in the Ammer catchment.
  - 15 – Equations S1-S7. Sediment source diagnosis based on the end-member-mixing analysis of sediment-bound PAHs.
  - Figure S1. Soil erosion maps of the Ammer catchment (a) and the state of Baden-Württemberg (b).
  - Figure S2. Flow duration curves of measured and modelled discharge of the Ammer River for year 2014-2016.
  - Figure S3. Relationships between measured turbidity and discharge for summer season (Left) and winter season (Right).
  - 20 – Figure S4. Measured and modelled suspended sediment concentrations for different events (the event becomes bigger from left to right of the figure).

**Table S1.** Sensitivity analysis of the sediment transport model

| Parameter | Adjustment factor<br>[-] | Rural<br>contribution [%] | NSE for entire SS, NSE <sub>e</sub> [-] |            | NSE for SS $\geq$ 30 mg L <sup>-1</sup> , NSE <sub>h</sub> [-] |            |
|-----------|--------------------------|---------------------------|-----------------------------------------|------------|----------------------------------------------------------------|------------|
|           |                          |                           | Calibration                             | Validation | Calibration                                                    | Validation |
| $M_{max}$ | -90%                     | 7.0                       | 0.21                                    | 0.09       | -0.23                                                          | -0.39      |
|           | -70%                     | 5.7                       | 0.31                                    | 0.20       | -0.05                                                          | -0.22      |
|           | -50%                     | 4.9                       | 0.38                                    | 0.27       | 0.10                                                           | -0.08      |
|           | -30%                     | 4.2                       | 0.43                                    | 0.32       | 0.22                                                           | 0.03       |
|           | -10%                     | 3.7                       | 0.45                                    | 0.33       | 0.31                                                           | 0.11       |
|           | +30%                     | 3.0                       | 0.43                                    | 0.25       | 0.42                                                           | 0.17       |
|           | +50%                     | 2.8                       | 0.38                                    | 0.17       | 0.43                                                           | 0.15       |
|           | +100%                    | 2.3                       | 0.14                                    | -0.16      | 0.33                                                           | -0.01      |
|           | +200%                    | 1.7                       | -0.79                                   | -1.36      | -0.37                                                          | -0.90      |
|           | +300%                    | 1.3                       | -2.32                                   | -3.29      | -1.75                                                          | -2.50      |
| $K_w$     | -90%                     | 6.9                       | 0.22                                    | 0.10       | -0.21                                                          | -0.38      |
|           | -70%                     | 5.6                       | 0.32                                    | 0.22       | -0.02                                                          | -0.19      |
|           | -50%                     | 4.8                       | 0.40                                    | 0.29       | 0.13                                                           | -0.04      |
|           | -30%                     | 4.2                       | 0.44                                    | 0.33       | 0.24                                                           | 0.06       |
|           | -10%                     | 3.7                       | 0.46                                    | 0.33       | 0.32                                                           | 0.12       |
|           | +30%                     | 3.1                       | 0.43                                    | 0.25       | 0.41                                                           | 0.14       |
|           | +50%                     | 2.8                       | 0.39                                    | 0.17       | 0.42                                                           | 0.11       |
|           | +100%                    | 2.4                       | 0.23                                    | -0.11      | 0.39                                                           | -0.05      |
|           | +200%                    | 1.9                       | -0.26                                   | -0.93      | 0.12                                                           | -0.63      |
|           | +300%                    | 1.7                       | -0.86                                   | -1.74      | -0.23                                                          | -0.96      |
| $C_h$     | -90%                     | 0.4                       | 0.50                                    | 0.32       | 0.34                                                           | 0.13       |
|           | -70%                     | 1.1                       | 0.49                                    | 0.32       | 0.34                                                           | 0.13       |
|           | -50%                     | 1.8                       | 0.49                                    | 0.32       | 0.34                                                           | 0.13       |
|           | -30%                     | 2.5                       | 0.48                                    | 0.32       | 0.35                                                           | 0.13       |
|           | -10%                     | 3.2                       | 0.47                                    | 0.32       | 0.35                                                           | 0.14       |
|           | +30%                     | 4.5                       | 0.43                                    | 0.32       | 0.35                                                           | 0.14       |
|           | +50%                     | 5.2                       | 0.40                                    | 0.32       | 0.35                                                           | 0.14       |
|           | +100%                    | 6.7                       | 0.33                                    | 0.31       | 0.36                                                           | 0.14       |
|           | +200%                    | 9.6                       | 0.10                                    | 0.30       | 0.36                                                           | 0.14       |
|           | +300%                    | 12.3                      | -0.20                                   | 0.29       | 0.36                                                           | 0.14       |
| $\tau_c$  | -90%                     | 9.7                       | 0.29                                    | 0.30       | 0.36                                                           | 0.15       |
|           | -70%                     | 7.8                       | 0.35                                    | 0.31       | 0.36                                                           | 0.15       |
|           | -50%                     | 6.3                       | 0.40                                    | 0.32       | 0.35                                                           | 0.14       |
|           | -30%                     | 5.0                       | 0.43                                    | 0.32       | 0.35                                                           | 0.14       |
|           | -10%                     | 4.0                       | 0.45                                    | 0.32       | 0.35                                                           | 0.14       |
|           | +30%                     | 2.5                       | 0.47                                    | 0.32       | 0.35                                                           | 0.13       |
|           | +50%                     | 1.9                       | 0.48                                    | 0.32       | 0.35                                                           | 0.13       |
|           | +100%                    | 1.1                       | 0.49                                    | 0.32       | 0.34                                                           | 0.13       |
|           | +200%                    | 0.3                       | 0.50                                    | 0.32       | 0.34                                                           | 0.13       |
|           | +300%                    | 0.1                       | 0.50                                    | 0.32       | 0.34                                                           | 0.13       |
| Base case | 0%                       | 3.5                       | 0.46                                    | 0.32       | 0.35                                                           | 0.14       |

\* The calibrated parameter-set is used as the base case.

**Table S2.** The PAH concentrations (the sum of 15 PAHs) on different particles in the Ammer catchment.

| Symbol     | Description                                                   | Value (mg kg <sup>-1</sup> ) | Remarks                              |
|------------|---------------------------------------------------------------|------------------------------|--------------------------------------|
| $c_u$      | PAH concentration on urban particles                          | 8.1                          | (Gocht et al., 2005)                 |
| $c_r$      | PAH concentration on rural particles                          | 1                            | based on measurements                |
| $c_{bf}$   | PAH concentration on baseflow particles                       | 1                            | assuming the same as rural particles |
| $c_{bd}$   | PAH concentration on river bed particles                      | 8.1                          | assuming the same as urban particles |
| $c_{bk}$   | PAH concentration on river bank particles                     | 0                            | regarded as clean particles          |
| $c_{p,ss}$ | Average PAH concentration on suspended particles at the gauge | 5.8                          | (Schwientek et al., 2013)            |

5 **Sediment source diagnosis based on the end-member-mixing analysis of sediment-bound PAHs.**

$$f_u + f_r + f_{bf} + f_{bd} + f_{bk} = 1, \text{ assuming } f_{bk}=0.06 \text{ from the model simulation} \quad (S1)$$

$$c_u f_u + c_r f_r + c_{bf} f_{bf} + c_{bd} f_{bd} + c_{bk} f_{bk} = c_{p,ss} \quad (S2)$$

Because  $c_u=c_{bd}$ ,  $c_r=c_{bf}$ , then we can get

$$c_u(f_u + f_{bd}) + c_r(f_r + f_{bf}) = 5.8 \quad (S3)$$

10  $f_u + f_{bd} = 0.68 \quad (S4)$

$$f_r + f_{bf} = 0.26 \quad (S5)$$

$$f_{bf} = \frac{\sum_{Q_i \leq 1} Q_i c_{ss,i}}{\sum Q_i c_{ss,i}} = 0.23 \quad (S6)$$

$$f_r = 0.03 \quad (S7)$$

in which,  $f_u$ ,  $f_r$ ,  $f_{bf}$ ,  $f_{bd}$ , and  $f_{bk}$  are the annual contribution fractions of urban, rural, baseflow, bed erosion, and bank  
15 erosion particles, respectively.  $Q_i$  and  $c_{ss,i}$  are the i-th measured discharge and suspended sediment concentration.

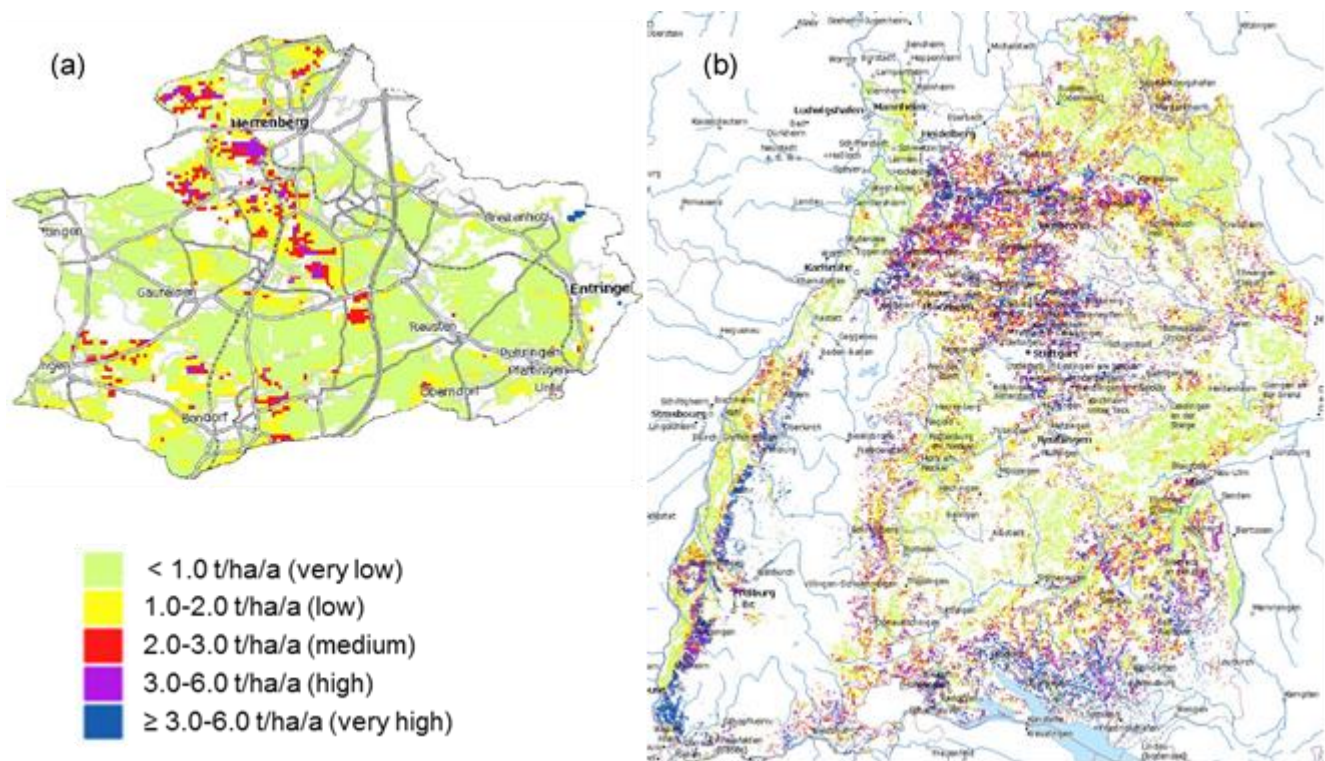

**Figure S1.** Soil erosion maps of the Ammer catchment (a) and the state of Baden-Württemberg (b). The white color in the maps represents forest. The original information can be found in <http://maps.lgrb-bw.de/>.

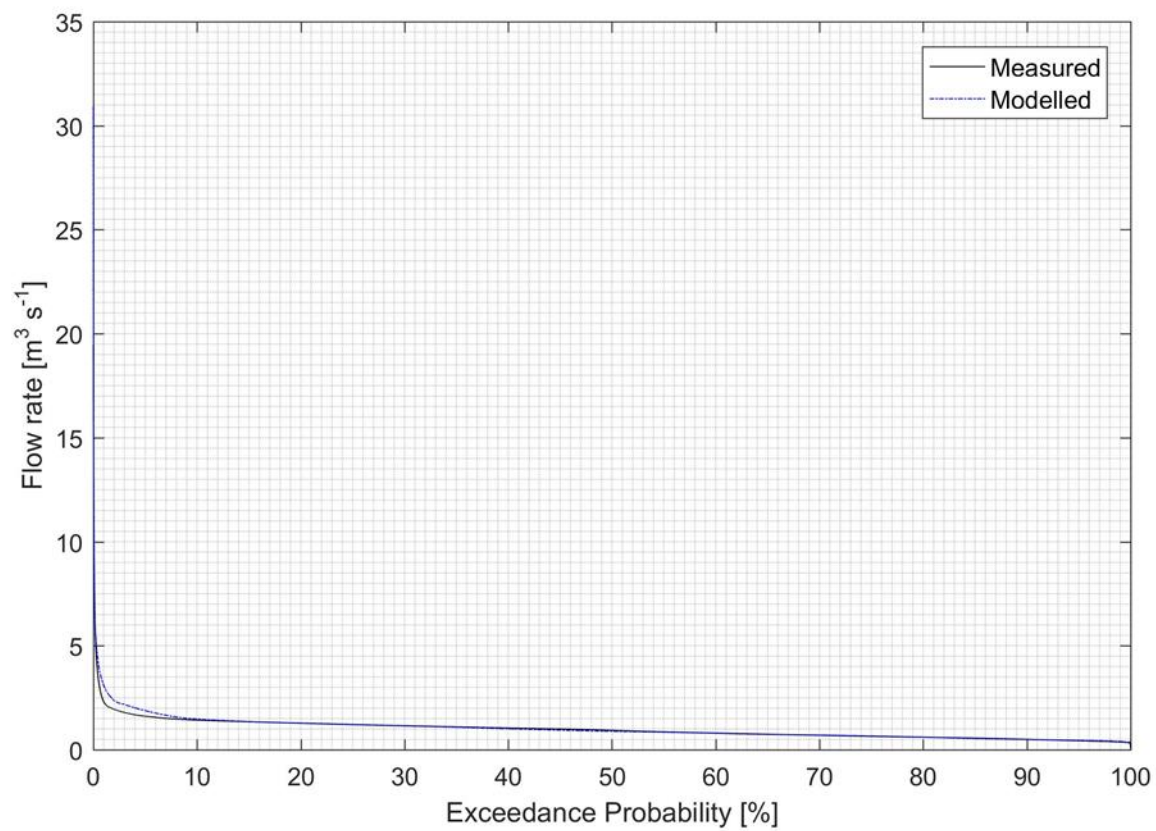

**Figure S2.** Flow duration curves of measured and modelled discharge of the Ammer River for year 2014-2016.

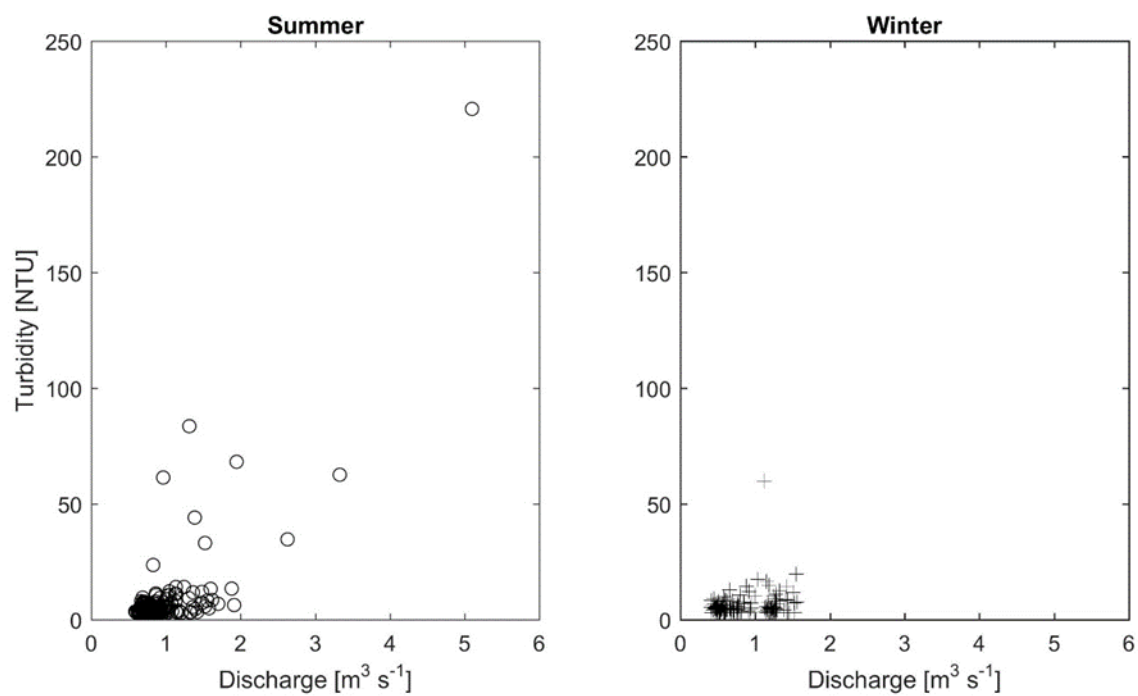

**Figure S3.** Relationships between measured turbidity and discharge for summer season (Left) and winter season (Right).

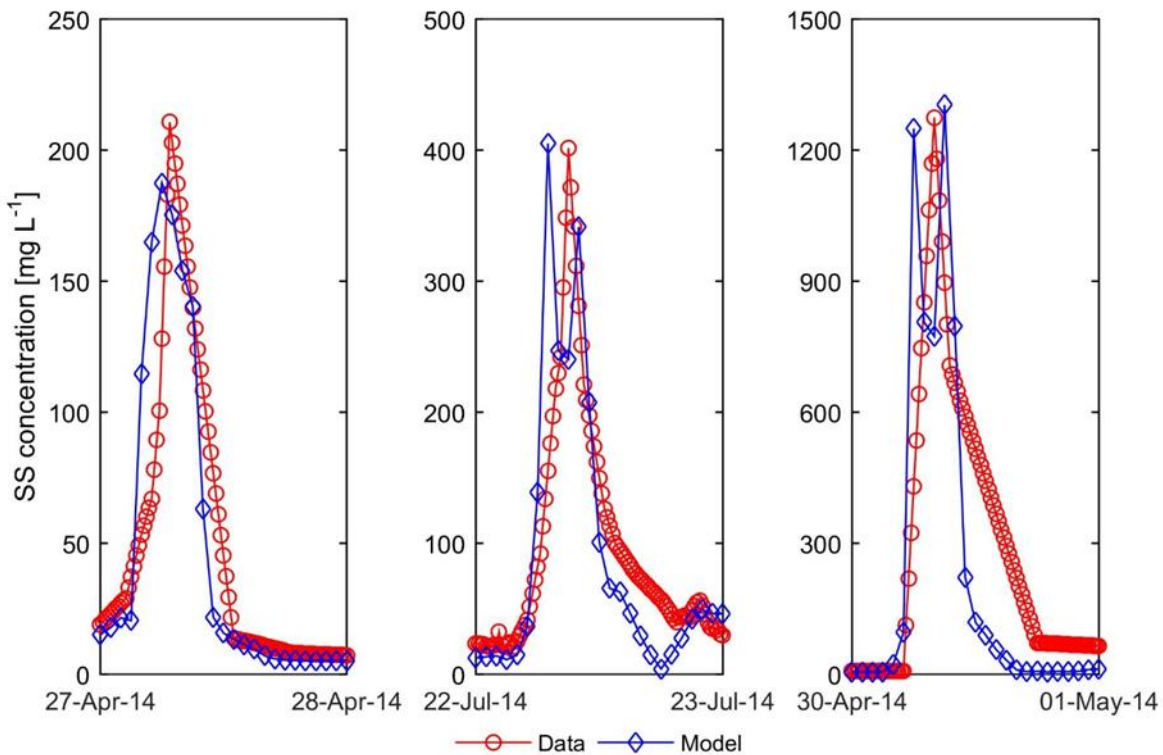

**Figure S4.** Measured and modelled suspended sediment concentrations for different events (the event becomes bigger from left to right of the figure).

5

## Reference

- Gocht, T., Steidle, D. K., and Grathwohl, P.: Polyzyklische aromatische Kohlenwasserstoffe in städtischen Umweltkompartimenten, Wasser und Abfall, 7, 10-15, 2005.
- 10 Schwientek, M., Rugner, H., Beckingham, B., Kuch, B., and Grathwohl, P.: Integrated monitoring of particle associated transport of PAHs in contrasting catchments, Environ Pollut, 172, 155-162, 10.1016/j.envpol.2012.09.004, 2013.
