# Supplementary material for: Contributions of catchment and in-stream processes to suspended sediment transport in a dominantly groundwater-fed catchment
Source: Copernicus journal article supplement (doi:10.5194/hess-22-3903-2018), 2018-07-19
Supplement: Supplementary file [file hess-22-3903-2018-supplement-title-page.pdf › hess-22-3903-2018-supplement-title-page.pdf]

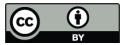

## *Supplement of*

# **Contributions of catchment and in-stream processes to suspended sediment transport in a dominantly groundwater-fed catchment**

**Yan Liu et al.**

*Correspondence to:* Olaf A. Cirpka (olaf.cirpka@uni-tuebingen.de)

- hess-22-3903-2018-supplement-title-page.pdf
- HESS\_2018-42\_Supplement
  - HEC-RAS
    - \* Amm\_final.f01
    - \* Amm\_final.g04
    - \* Amm\_final.p07
    - \* Amm\_final.prj
    - \* Amm\_final.q03
    - \* Amm\_final.s03
    - \* Read\_me.txt
  - Sediment\_Transport\_Model
    - \* FlowForSedGen.mat
    - \* FlowSedGen.m
    - \* Main\_script\_RivSed.m
    - \* Read\_me.txt
    - \* Run\_script.m
    - \* Sediment\_Amm\_m.m
    - \* Sediment\_Kas\_m.m
    - \* Sediment\_Koch\_m.m
    - \* c0\_amm.txt
    - \* c0\_kas.txt
    - \* c0\_koch.txt
    - \* p\_bestfit\_sel.mat
    - \* subcatchment\_char.txt
  - Supplement.pdf

The copyright of individual parts of the supplement might differ from the CC BY 4.0 License.
